# Supplementary material
Source: Springer Nature journal article supplement (https://www.springermedizin.de/resource/supplementary/12879_2013_4185_MOESM2_ESM.pdf/9446104)

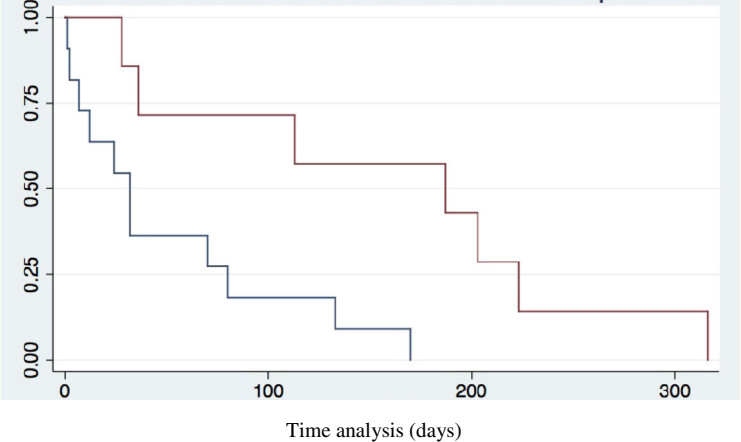

Number at risk at each time point:

|     |    |   |   |   |
|-----|----|---|---|---|
| (A) | 7  | 5 | 3 | 1 |
| (B) | 11 | 2 | 0 | 0 |

rifampin group (A) 

Group with no rifampin (B) 

Supplement: MOESM2 [file 9446104]
